# Supplementary material for: T-Shaped donor–acceptor–donor type tetraphenylethylene substituted quinoxaline derivatives: aggregation-induced emission and mechanochromism
Source: Royal Society of Chemistry journal article supplement (doi:10.1039/c7nj01531c), 2017-01-01

## Supporting Information

### **T-shaped donor-acceptor-donor type tetraphenylethylene substituted quinoxaline derivatives: Aggregation induced emission and mechanochromism**

**Anupama Ekbote, Thaksen Jadhav and Rajneesh Misra\***

Department of Chemistry, Indian Institute of Technology Indore,

Indore- 453552, India

\* Corresponding author

Email: rajneeshmisra@iiti.ac.in

#### **Table of Contents**

|             |                                                                 |            |
|-------------|-----------------------------------------------------------------|------------|
| <b>I.</b>   | <b>Thermogravimetric analysis</b> .....                         | <b>S2</b>  |
| <b>II.</b>  | <b>Photophysical properties</b> .....                           | <b>S2</b>  |
| <b>III.</b> | <b>Mechanochromism</b> .....                                    | <b>S3</b>  |
| <b>IV.</b>  | <b>Electrochemical study</b> .....                              | <b>S4</b>  |
| <b>V.</b>   | <b>DFT calculations</b> .....                                   | <b>S5</b>  |
| <b>VI.</b>  | <b>Copies of NMR and HRMS spectra of the new compound</b> ..... | <b>S10</b> |

## Thermogravimetric analysis.

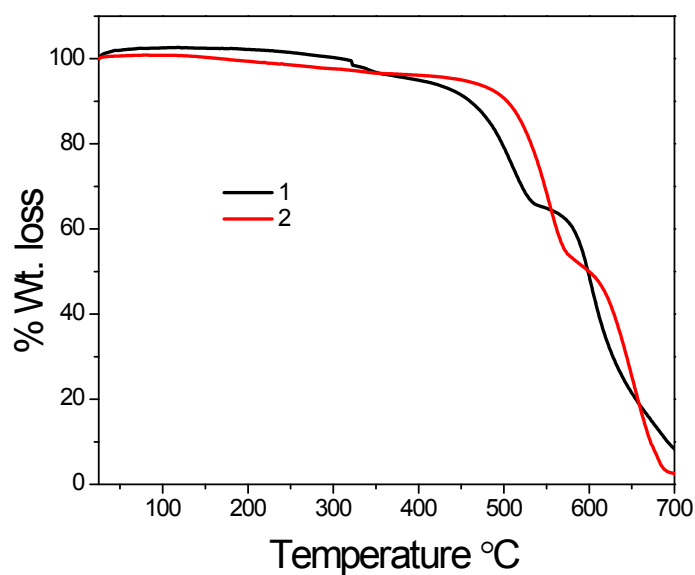

**Fig. S1** Thermogravimetric analysis of luminophores **1** and **2** measured at a heating rate of 10 °C/min under nitrogen atmosphere.

## Photophysical properties.

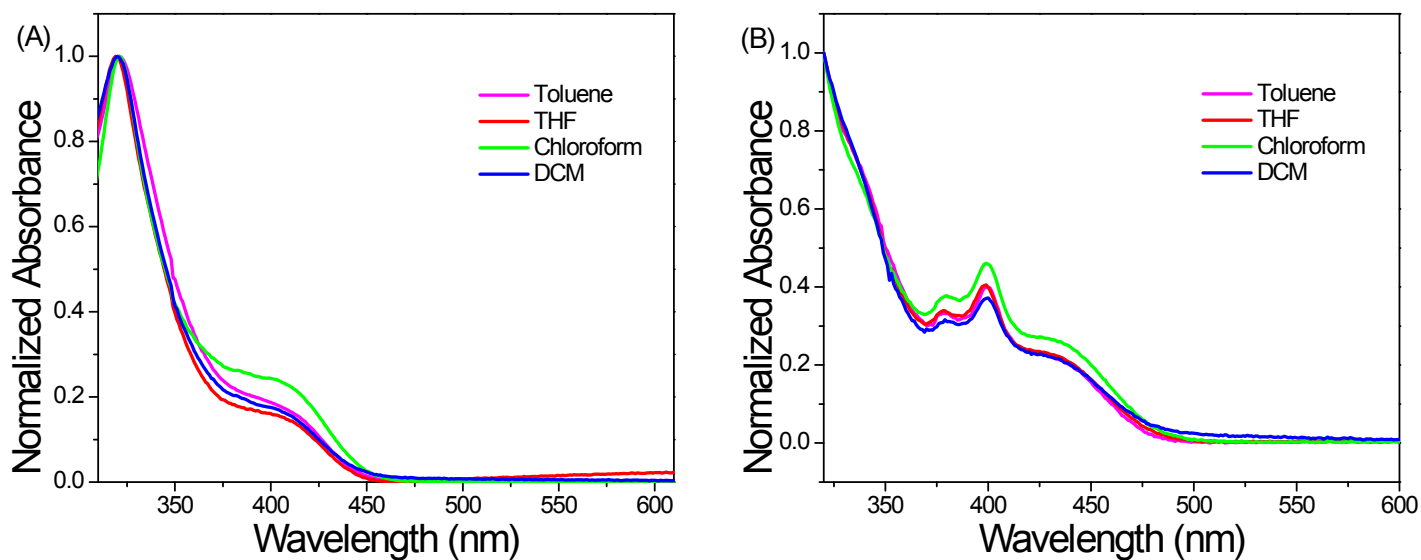

**Fig. S2** UV-vis absorption spectra of **1** (A) and **2** (B) in different solvents of varying polarities

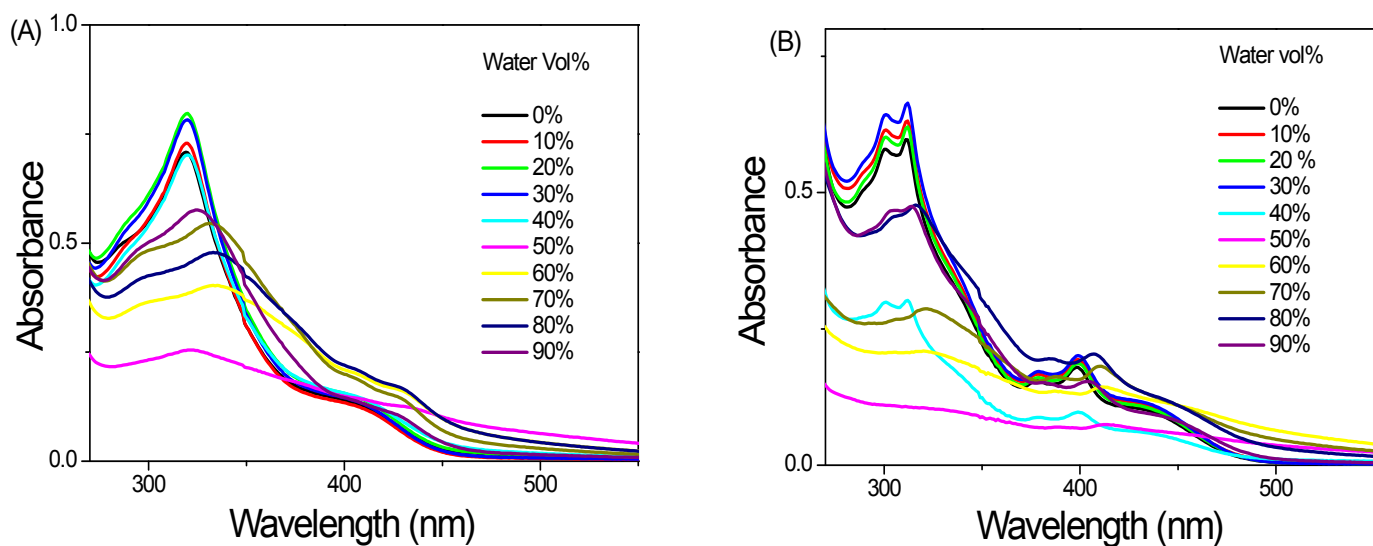

**Fig. S3** UV-vis absorption spectra of **1** (A) and **2** (B) in THF–water mixtures with different water fractions.

### Mechanochromism.

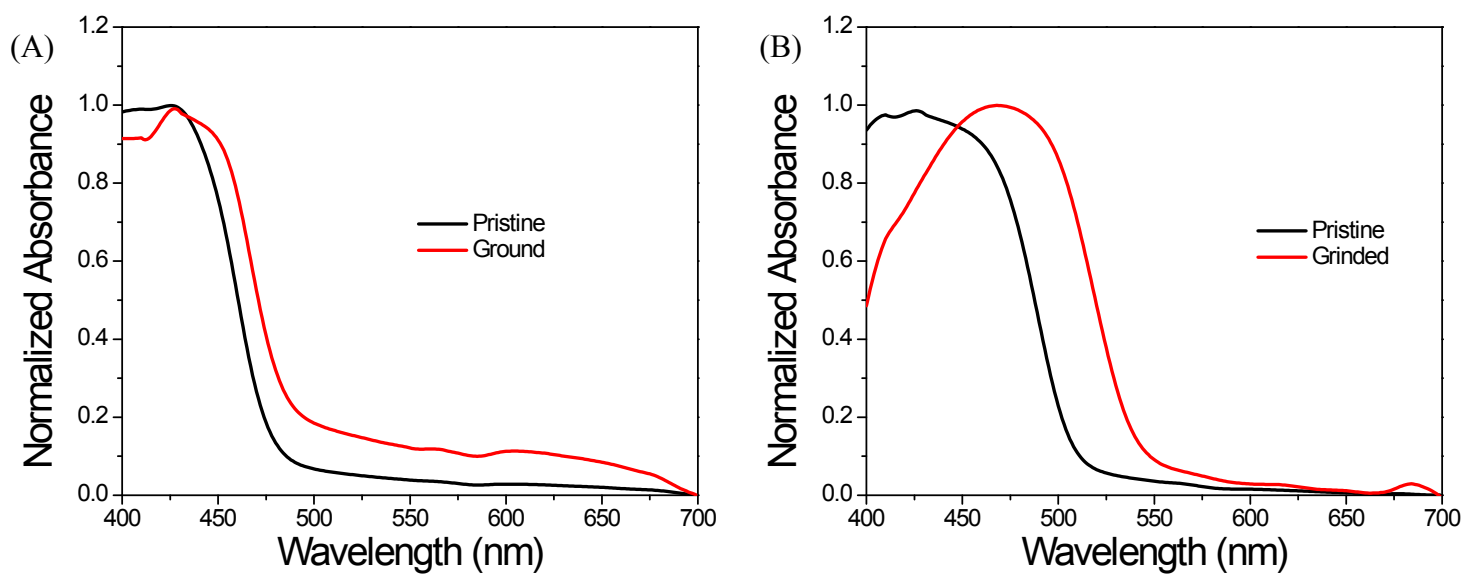

**Fig. S4** Solid state absorption spectra of **1** (A) and **2** (B) in pristine and its ground form

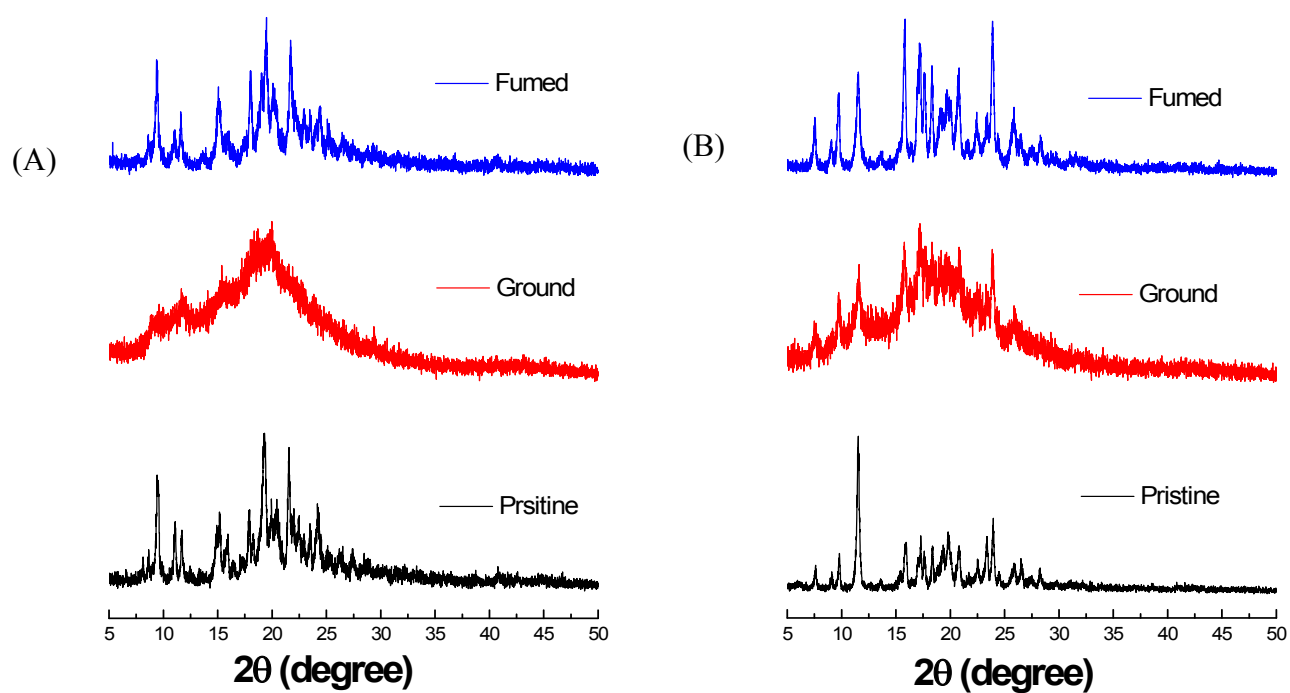

**Fig. S5** PXRD curves of **1** (A) and **2** (B) in pristine, ground, and fumed form.

### Electrochemical study

**Table S1.** Electrochemical properties of **1** and **2**.

| Compounds | HOMO <sup>a</sup> eV | LUMO <sup>a</sup> eV | Electrochemical band gap eV |
|-----------|----------------------|----------------------|-----------------------------|
| <b>1</b>  | -5.50                | -3.57                | 1.93                        |
| <b>2</b>  | -5.52                | -3.54                | 1.88                        |

<sup>a</sup> Calculated from CV: Reference electrode- Ag/AgCl.

## DFT calculation data of 1 and 2.

Calculation method: B3LYP/6-31G(d,p) with Gaussian 09

1:

Standard orientation:

| Center<br>Number | Atomic<br>Number | Atomic<br>Type | Coordinates (Angstroms) |           |           |
|------------------|------------------|----------------|-------------------------|-----------|-----------|
|                  |                  |                | X                       | Y         | Z         |
| 1                | 6                | 0              | 2.757177                | 5.869155  | -0.270586 |
| 2                | 6                | 0              | 1.647549                | 6.697222  | -0.332536 |
| 3                | 6                | 0              | 0.336400                | 6.142976  | -0.363330 |
| 4                | 6                | 0              | 0.259356                | 4.739849  | -0.329798 |
| 5                | 6                | 0              | 1.393772                | 3.889350  | -0.267420 |
| 6                | 6                | 0              | 2.653019                | 4.451659  | -0.235817 |
| 7                | 1                | 0              | -0.915780               | 7.922551  | -0.451480 |
| 8                | 1                | 0              | 3.746423                | 6.316967  | -0.247818 |
| 9                | 1                | 0              | 1.777343                | 7.775880  | -0.357039 |
| 10               | 6                | 0              | -0.905691               | 6.836284  | -0.422708 |
| 11               | 6                | 0              | -0.962033               | 4.017152  | -0.351048 |
| 12               | 1                | 0              | 3.546639                | 3.837164  | -0.182340 |
| 13               | 6                | 0              | -2.150836               | 4.713822  | -0.407085 |
| 14               | 6                | 0              | -2.100305               | 6.133910  | -0.443085 |
| 15               | 1                | 0              | -3.105466               | 4.197521  | -0.422963 |
| 16               | 1                | 0              | -3.034647               | 6.685723  | -0.487909 |
| 17               | 6                | 0              | 0.862050                | 2.517658  | -0.252536 |
| 18               | 6                | 0              | -0.585622               | 2.595506  | -0.303034 |
| 19               | 6                | 0              | 0.732553                | 0.247570  | -0.195472 |
| 20               | 6                | 0              | -0.706844               | 0.323803  | -0.243412 |
| 21               | 7                | 0              | 1.505023                | 1.381150  | -0.195741 |
| 22               | 7                | 0              | -1.350492               | 1.534850  | -0.293152 |
| 23               | 6                | 0              | 1.387065                | -1.022317 | -0.110731 |
| 24               | 6                | 0              | 0.585632                | -2.154674 | -0.055922 |
| 25               | 1                | 0              | 1.058078                | -3.131088 | -0.012448 |
| 26               | 6                | 0              | -0.815956               | -2.081030 | -0.103792 |
| 27               | 1                | 0              | -1.387569               | -3.003693 | -0.097817 |
| 28               | 6                | 0              | -1.493488               | -0.872298 | -0.206030 |
| 29               | 6                | 0              | 2.865145                | -1.152295 | -0.064455 |
| 30               | 6                | 0              | 3.464103                | -2.026135 | 0.858366  |
| 31               | 6                | 0              | 3.706855                | -0.459768 | -0.951497 |
| 32               | 6                | 0              | 4.845097                | -2.191741 | 0.903305  |
| 33               | 1                | 0              | 2.838835                | -2.563705 | 1.565314  |
| 34               | 6                | 0              | 5.086047                | -0.622199 | -0.902551 |
| 35               | 1                | 0              | 3.272869                | 0.205818  | -1.687563 |
| 36               | 6                | 0              | 5.688651                | -1.475689 | 0.037607  |
| 37               | 1                | 0              | 5.279836                | -2.871626 | 1.629676  |
| 38               | 1                | 0              | 5.712462                | -0.080624 | -1.603466 |
| 39               | 6                | 0              | 7.169744                | -1.656483 | 0.090335  |
| 40               | 6                | 0              | 8.039015                | -0.601304 | 0.094540  |
| 41               | 6                | 0              | 7.624952                | -3.079464 | 0.144735  |
| 42               | 6                | 0              | 9.510064                | -0.766672 | -0.114097 |
| 43               | 6                | 0              | 7.594233                | 0.810018  | 0.310859  |
| 44               | 6                | 0              | 7.080845                | -4.035447 | -0.731007 |

|     |   |   |            |           |           |
|-----|---|---|------------|-----------|-----------|
| 45  | 6 | 0 | 8.556203   | -3.512997 | 1.103460  |
| 46  | 6 | 0 | 10.428061  | -0.126849 | 0.737386  |
| 47  | 6 | 0 | 10.015398  | -1.513891 | -1.191503 |
| 48  | 6 | 0 | 8.057813   | 1.840948  | -0.525842 |
| 49  | 6 | 0 | 6.753661   | 1.154355  | 1.382913  |
| 50  | 6 | 0 | 7.478052   | -5.370037 | -0.671954 |
| 51  | 1 | 0 | 6.344190   | -3.723333 | -1.465212 |
| 52  | 6 | 0 | 8.944464   | -4.849874 | 1.170885  |
| 53  | 1 | 0 | 8.973738   | -2.793190 | 1.799661  |
| 54  | 6 | 0 | 11.801279  | -0.256551 | 0.538176  |
| 55  | 1 | 0 | 10.056788  | 0.471568  | 1.563884  |
| 56  | 6 | 0 | 11.388534  | -1.634153 | -1.397946 |
| 57  | 1 | 0 | 9.322128   | -2.000103 | -1.869744 |
| 58  | 6 | 0 | 7.668813   | 3.162846  | -0.317897 |
| 59  | 1 | 0 | 8.724927   | 1.597489  | -1.347155 |
| 60  | 6 | 0 | 6.373449   | 2.477733  | 1.598976  |
| 61  | 1 | 0 | 6.398687   | 0.375266  | 2.049087  |
| 62  | 6 | 0 | 8.411781   | -5.783498 | 0.280153  |
| 63  | 1 | 0 | 7.053983   | -6.088828 | -1.367452 |
| 64  | 1 | 0 | 9.661753   | -5.163181 | 1.924155  |
| 65  | 6 | 0 | 12.287949  | -1.010928 | -0.531109 |
| 66  | 1 | 0 | 12.492153  | 0.236140  | 1.216530  |
| 67  | 1 | 0 | 11.755945  | -2.212861 | -2.240662 |
| 68  | 6 | 0 | 6.825254   | 3.487631  | 0.746838  |
| 69  | 1 | 0 | 8.030388   | 3.941040  | -0.984167 |
| 70  | 1 | 0 | 5.727775   | 2.720463  | 2.438036  |
| 71  | 1 | 0 | 8.715963   | -6.824876 | 0.332141  |
| 72  | 1 | 0 | 13.357947  | -1.106219 | -0.691428 |
| 73  | 1 | 0 | 6.533929   | 4.519915  | 0.919456  |
| 74  | 6 | 0 | -2.977462  | -0.861860 | -0.257118 |
| 75  | 6 | 0 | -3.697052  | -0.066893 | -1.166025 |
| 76  | 6 | 0 | -3.711399  | -1.713140 | 0.586844  |
| 77  | 6 | 0 | -5.084662  | -0.127630 | -1.225772 |
| 78  | 1 | 0 | -3.161486  | 0.596269  | -1.833840 |
| 79  | 6 | 0 | -5.100839  | -1.760708 | 0.537551  |
| 80  | 1 | 0 | -3.185343  | -2.332658 | 1.307266  |
| 81  | 6 | 0 | -5.820747  | -0.959641 | -0.363230 |
| 82  | 1 | 0 | -5.612813  | 0.482795  | -1.952102 |
| 83  | 1 | 0 | -5.637841  | -2.421979 | 1.209355  |
| 84  | 6 | 0 | -7.309877  | -1.021153 | -0.451103 |
| 85  | 6 | 0 | -8.120294  | -0.964192 | 0.648226  |
| 86  | 6 | 0 | -7.847787  | -1.144886 | -1.841218 |
| 87  | 6 | 0 | -9.580339  | -1.281335 | 0.590447  |
| 88  | 6 | 0 | -7.620296  | -0.576719 | 2.002901  |
| 89  | 6 | 0 | -7.311289  | -2.090075 | -2.732937 |
| 90  | 6 | 0 | -8.856979  | -0.287983 | -2.311593 |
| 91  | 6 | 0 | -10.519493 | -0.428337 | 1.196798  |
| 92  | 6 | 0 | -10.049351 | -2.459240 | -0.015225 |
| 93  | 6 | 0 | -7.972928  | -1.331972 | 3.135370  |
| 94  | 6 | 0 | -6.839131  | 0.575926  | 2.192199  |
| 95  | 6 | 0 | -7.790070  | -2.197092 | -4.037468 |
| 96  | 1 | 0 | -6.515553  | -2.746640 | -2.393997 |
| 97  | 6 | 0 | -9.327719  | -0.386511 | -3.619765 |
| 98  | 1 | 0 | -9.271191  | 0.459263  | -1.642810 |
| 99  | 6 | 0 | -11.880841 | -0.725188 | 1.168612  |
| 100 | 1 | 0 | -10.174205 | 0.475907  | 1.688835  |
| 101 | 6 | 0 | -11.409643 | -2.762457 | -0.033244 |
| 102 | 1 | 0 | -9.337853  | -3.138771 | -0.472384 |

|     |   |   |            |           |           |
|-----|---|---|------------|-----------|-----------|
| 103 | 6 | 0 | -7.533360  | -0.966385 | 4.406376  |
| 104 | 1 | 0 | -8.593097  | -2.214671 | 3.011911  |
| 105 | 6 | 0 | -6.408819  | 0.948080  | 3.464493  |
| 106 | 1 | 0 | -6.570232  | 1.180650  | 1.332539  |
| 107 | 6 | 0 | -8.800810  | -1.345089 | -4.486947 |
| 108 | 1 | 0 | -7.369496  | -2.943567 | -4.705373 |
| 109 | 1 | 0 | -10.105341 | 0.289970  | -3.962954 |
| 110 | 6 | 0 | -12.332191 | -1.894314 | 0.553157  |
| 111 | 1 | 0 | -12.589628 | -0.044760 | 1.632147  |
| 112 | 1 | 0 | -11.748688 | -3.681292 | -0.503216 |
| 113 | 6 | 0 | -6.749133  | 0.176019  | 4.576704  |
| 114 | 1 | 0 | -7.807442  | -1.572388 | 5.265370  |
| 115 | 1 | 0 | -5.808290  | 1.844930  | 3.586889  |
| 116 | 1 | 0 | -9.169043  | -1.422806 | -5.505799 |
| 117 | 1 | 0 | -13.392302 | -2.130195 | 0.537273  |
| 118 | 1 | 0 | -6.411667  | 0.465499  | 5.567660  |

-----  
Total Energy (HF) = -2804.7661982Hartree

**2:**

Standard orientation:

| Center<br>Number | Atomic<br>Number | Atomic<br>Type | Coordinates (Angstroms) |           |           |
|------------------|------------------|----------------|-------------------------|-----------|-----------|
|                  |                  |                | X                       | Y         | Z         |
| 1                | 6                | 0              | 0.005257                | 3.566913  | 4.858408  |
| 2                | 6                | 0              | 0.010707                | 2.856196  | 3.670094  |
| 3                | 6                | 0              | 0.003756                | 1.448790  | 3.673302  |
| 4                | 6                | 0              | 0.001087                | 0.736762  | 4.900411  |
| 5                | 6                | 0              | -0.002356               | 1.488031  | 6.093798  |
| 6                | 6                | 0              | -0.002356               | 2.874787  | 6.076954  |
| 7                | 6                | 0              | -0.005257               | 0.716481  | 2.406717  |
| 8                | 6                | 0              | -0.001087               | -0.736762 | 4.900411  |
| 9                | 6                | 0              | -0.003756               | -1.448790 | 3.673302  |
| 10               | 6                | 0              | 0.005257                | -0.716481 | 2.406717  |
| 11               | 6                | 0              | -0.010707               | -2.856196 | 3.670094  |
| 12               | 1                | 0              | -0.022787               | -3.367591 | 2.714482  |
| 13               | 6                | 0              | -0.005257               | -3.566913 | 4.858408  |
| 14               | 6                | 0              | 0.002356                | -2.874787 | 6.076954  |
| 15               | 6                | 0              | 0.002356                | -1.488031 | 6.093798  |
| 16               | 1                | 0              | 0.006542                | 4.652115  | 4.838462  |
| 17               | 1                | 0              | 0.022787                | 3.367591  | 2.714482  |
| 18               | 1                | 0              | -0.007118               | 0.983660  | 7.052727  |
| 19               | 1                | 0              | -0.007315               | 3.421757  | 7.015408  |
| 20               | 1                | 0              | -0.006542               | -4.652115 | 4.838462  |
| 21               | 1                | 0              | 0.007315                | -3.421757 | 7.015408  |
| 22               | 1                | 0              | 0.007118                | -0.983660 | 7.052727  |
| 23               | 6                | 0              | -0.031724               | 0.719992  | 0.098197  |
| 24               | 6                | 0              | 0.031724                | -0.719992 | 0.098197  |
| 25               | 7                | 0              | -0.030250               | 1.395332  | 1.267148  |
| 26               | 7                | 0              | 0.030250                | -1.395332 | 1.267148  |
| 27               | 6                | 0              | -0.076940               | 1.447985  | -1.141623 |
| 28               | 6                | 0              | -0.040507               | 0.704072  | -2.308816 |
| 29               | 1                | 0              | -0.088780               | 1.219592  | -3.262866 |
| 30               | 6                | 0              | 0.040507                | -0.704072 | -2.308816 |

|    |   |   |           |            |           |
|----|---|---|-----------|------------|-----------|
| 31 | 1 | 0 | 0.088780  | -1.219592  | -3.262866 |
| 32 | 6 | 0 | 0.076940  | -1.447985  | -1.141623 |
| 33 | 6 | 0 | 0.143139  | -2.928926  | -1.204408 |
| 34 | 6 | 0 | -0.626363 | -3.622678  | -2.154746 |
| 35 | 6 | 0 | 1.001101  | -3.683210  | -0.384356 |
| 36 | 6 | 0 | -0.536417 | -5.004036  | -2.288366 |
| 37 | 1 | 0 | -1.316905 | -3.071250  | -2.785908 |
| 38 | 6 | 0 | 1.079914  | -5.066234  | -0.509779 |
| 39 | 1 | 0 | 1.621273  | -3.177331  | 0.345174  |
| 40 | 6 | 0 | 0.309114  | -5.759547  | -1.458695 |
| 41 | 1 | 0 | -1.137574 | -5.509509  | -3.038106 |
| 42 | 1 | 0 | 1.759274  | -5.621907  | 0.128433  |
| 43 | 6 | 0 | 0.428218  | -7.237059  | -1.637746 |
| 44 | 6 | 0 | 0.368670  | -8.120013  | -0.596519 |
| 45 | 6 | 0 | 0.620374  | -7.675457  | -3.054821 |
| 46 | 6 | 0 | 0.750628  | -9.558507  | -0.743274 |
| 47 | 6 | 0 | -0.089202 | -7.733319  | 0.772613  |
| 48 | 6 | 0 | 1.575672  | -7.046779  | -3.872533 |
| 49 | 6 | 0 | -0.182477 | -8.678681  | -3.623123 |
| 50 | 6 | 0 | -0.087804 | -10.575056 | -0.252866 |
| 51 | 6 | 0 | 1.976353  | -9.930452  | -1.320392 |
| 52 | 6 | 0 | 0.618886  | -8.163784  | 1.908894  |
| 53 | 6 | 0 | -1.270052 | -6.996173  | 0.968122  |
| 54 | 6 | 0 | 1.744985  | -7.430727  | -5.201509 |
| 55 | 1 | 0 | 2.190812  | -6.254948  | -3.455823 |
| 56 | 6 | 0 | -0.022514 | -9.053685  | -4.956005 |
| 57 | 1 | 0 | -0.936682 | -9.163004  | -3.011803 |
| 58 | 6 | 0 | 0.271585  | -11.916818 | -0.366174 |
| 59 | 1 | 0 | -1.029821 | -10.305900 | 0.215412  |
| 60 | 6 | 0 | 2.341674  | -11.271622 | -1.422866 |
| 61 | 1 | 0 | 2.643756  | -9.158209  | -1.688247 |
| 62 | 6 | 0 | 0.175140  | -7.850757  | 3.192359  |
| 63 | 1 | 0 | 1.523513  | -8.749966  | 1.779358  |
| 64 | 6 | 0 | -1.719501 | -6.690103  | 2.251216  |
| 65 | 1 | 0 | -1.839702 | -6.668999  | 0.104930  |
| 66 | 6 | 0 | 0.945460  | -8.435738  | -5.749547 |
| 67 | 1 | 0 | 2.498752  | -6.940760  | -5.811393 |
| 68 | 1 | 0 | -0.658140 | -9.828067  | -5.375974 |
| 69 | 6 | 0 | 1.488739  | -12.271029 | -0.951592 |
| 70 | 1 | 0 | -0.397756 | -12.686551 | 0.007561  |
| 71 | 1 | 0 | 3.296537  | -11.535604 | -1.868487 |
| 72 | 6 | 0 | -0.999046 | -7.115735  | 3.369540  |
| 73 | 1 | 0 | 0.742058  | -8.189758  | 4.054835  |
| 74 | 1 | 0 | -2.639426 | -6.126774  | 2.378029  |
| 75 | 1 | 0 | 1.071257  | -8.729803  | -6.787520 |
| 76 | 1 | 0 | 1.772837  | -13.316167 | -1.033189 |
| 77 | 1 | 0 | -1.358199 | -6.888714  | 4.369268  |
| 78 | 6 | 0 | -0.143139 | 2.928926   | -1.204408 |
| 79 | 6 | 0 | 0.626363  | 3.622678   | -2.154746 |
| 80 | 6 | 0 | -1.001101 | 3.683210   | -0.384356 |
| 81 | 6 | 0 | 0.536417  | 5.004036   | -2.288366 |
| 82 | 1 | 0 | 1.316905  | 3.071250   | -2.785908 |
| 83 | 6 | 0 | -1.079914 | 5.066234   | -0.509779 |
| 84 | 1 | 0 | -1.621273 | 3.177331   | 0.345174  |
| 85 | 6 | 0 | -0.309114 | 5.759547   | -1.458695 |
| 86 | 1 | 0 | 1.137574  | 5.509509   | -3.038106 |
| 87 | 1 | 0 | -1.759274 | 5.621907   | 0.128433  |
| 88 | 6 | 0 | -0.428218 | 7.237059   | -1.637746 |



|     |   |   |           |           |           |
|-----|---|---|-----------|-----------|-----------|
| 89  | 6 | 0 | -0.368670 | 8.120013  | -0.596519 |
| 90  | 6 | 0 | -0.620374 | 7.675457  | -3.054821 |
| 91  | 6 | 0 | -0.750628 | 9.558507  | -0.743274 |
| 92  | 6 | 0 | 0.089202  | 7.733319  | 0.772613  |
| 93  | 6 | 0 | -1.575672 | 7.046779  | -3.872533 |
| 94  | 6 | 0 | 0.182477  | 8.678681  | -3.623123 |
| 95  | 6 | 0 | 0.087804  | 10.575056 | -0.252866 |
| 96  | 6 | 0 | -1.976353 | 9.930452  | -1.320392 |
| 97  | 6 | 0 | -0.618886 | 8.163784  | 1.908894  |
| 98  | 6 | 0 | 1.270052  | 6.996173  | 0.968122  |
| 99  | 6 | 0 | -1.744985 | 7.430727  | -5.201509 |
| 100 | 1 | 0 | -2.190812 | 6.254948  | -3.455823 |
| 101 | 6 | 0 | 0.022514  | 9.053685  | -4.956005 |
| 102 | 1 | 0 | 0.936682  | 9.163004  | -3.011803 |
| 103 | 6 | 0 | -0.271585 | 11.916818 | -0.366174 |
| 104 | 1 | 0 | 1.029821  | 10.305900 | 0.215412  |
| 105 | 6 | 0 | -2.341674 | 11.271622 | -1.422866 |
| 106 | 1 | 0 | -2.643756 | 9.158209  | -1.688247 |
| 107 | 6 | 0 | -0.175140 | 7.850757  | 3.192359  |
| 108 | 1 | 0 | -1.523513 | 8.749966  | 1.779358  |
| 109 | 6 | 0 | 1.719501  | 6.690103  | 2.251216  |
| 110 | 1 | 0 | 1.839702  | 6.668999  | 0.104930  |
| 111 | 6 | 0 | -0.945460 | 8.435738  | -5.749547 |
| 112 | 1 | 0 | -2.498752 | 6.940760  | -5.811393 |
| 113 | 1 | 0 | 0.658140  | 9.828067  | -5.375974 |
| 114 | 6 | 0 | -1.488739 | 12.271029 | -0.951592 |
| 115 | 1 | 0 | 0.397756  | 12.686551 | 0.007561  |
| 116 | 1 | 0 | -3.296537 | 11.535604 | -1.868487 |
| 117 | 6 | 0 | 0.999046  | 7.115735  | 3.369540  |
| 118 | 1 | 0 | -0.742058 | 8.189758  | 4.054835  |
| 119 | 1 | 0 | 2.639426  | 6.126774  | 2.378029  |
| 120 | 1 | 0 | -1.071257 | 8.729803  | -6.787520 |
| 121 | 1 | 0 | -1.772837 | 13.316167 | -1.033189 |
| 122 | 1 | 0 | 1.358199  | 6.888714  | 4.369268  |

-----  
Total Energy (HF) = -2882.2081542Hartree

# Copies of NMR and HRMS spectra of the new compounds.

## <sup>1</sup>H NMR of 1

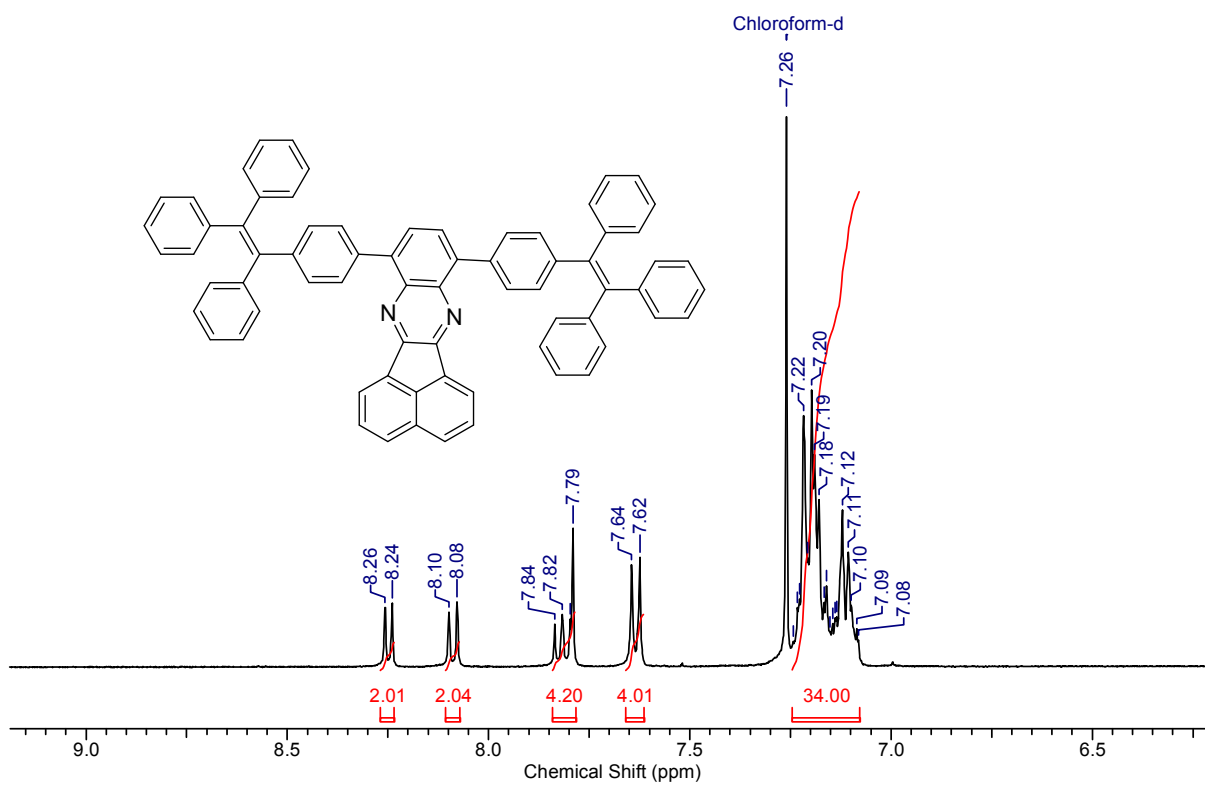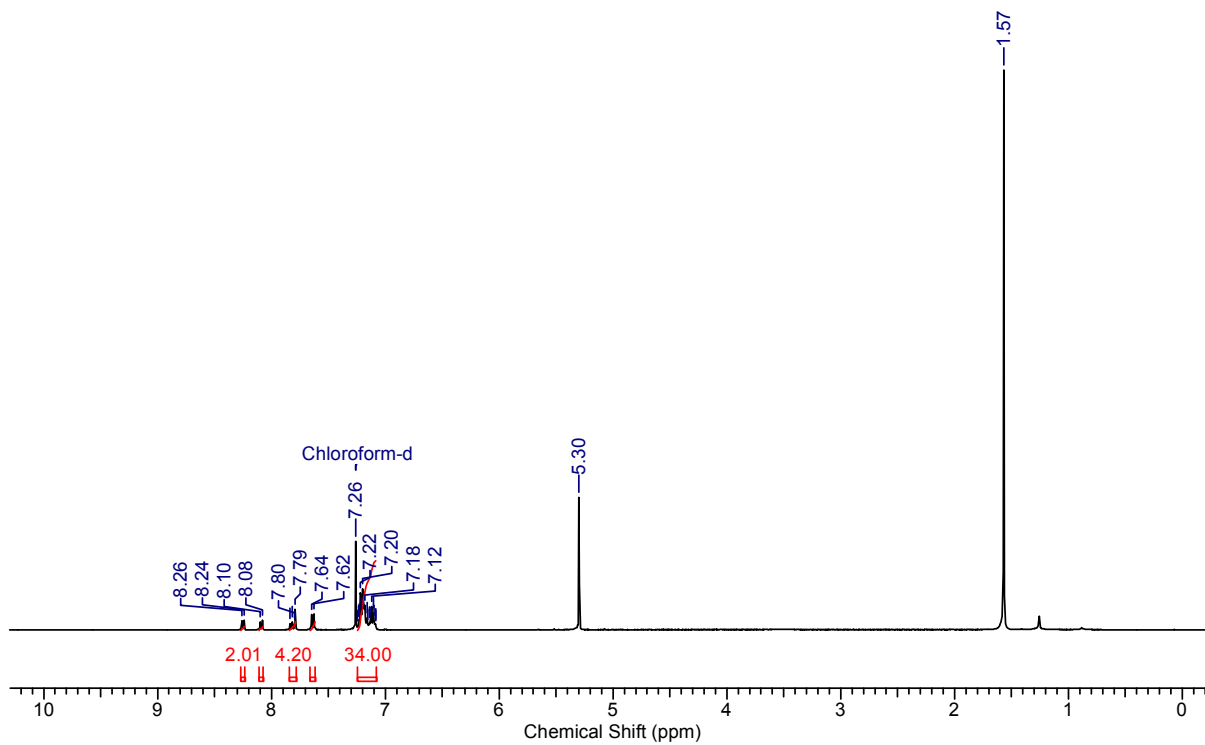

HRMS of **1**

# Display Report

## Analysis Info

Analysis Name C:\Users\liti\Desktop\rm-ae-01-43b-hrms\_RB3\_01\_505\rm-ae-01-43b-hrms\_RB3\_01\_505.d  
Method lcms\_direct infusion(ms+ lc)\_3000.m  
Sample Name rm-ae-01-43b-hrms  
Comment

Acquisition Date 10/18/2016 10:41:34 AM

Operator Ghanashyam Bhavsar  
Instrument micrOTOF-Q II 10348

## Acquisition Parameter

|             |            |                       |           |                  |           |
|-------------|------------|-----------------------|-----------|------------------|-----------|
| Source Type | ESI        | Ion Polarity          | Positive  | Set Nebulizer    | 2.0 Bar   |
| Focus       | Not active | Set Capillary         | 4500 V    | Set Dry Heater   | 250 °C    |
| Scan Begin  | 21 m/z     | Set End Plate Offset  | -500 V    | Set Dry Gas      | 7.0 l/min |
| Scan End    | 3000 m/z   | Set Collision Cell RF | 650.0 Vpp | Set Divert Valve | Waste     |

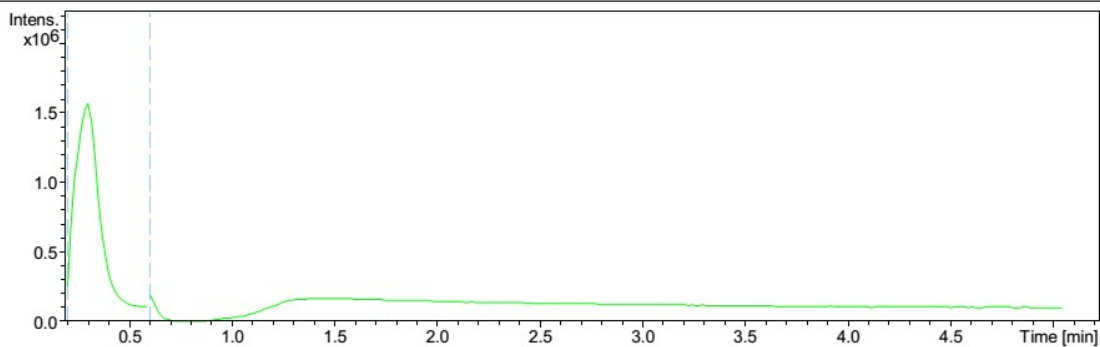

TIC +All MS

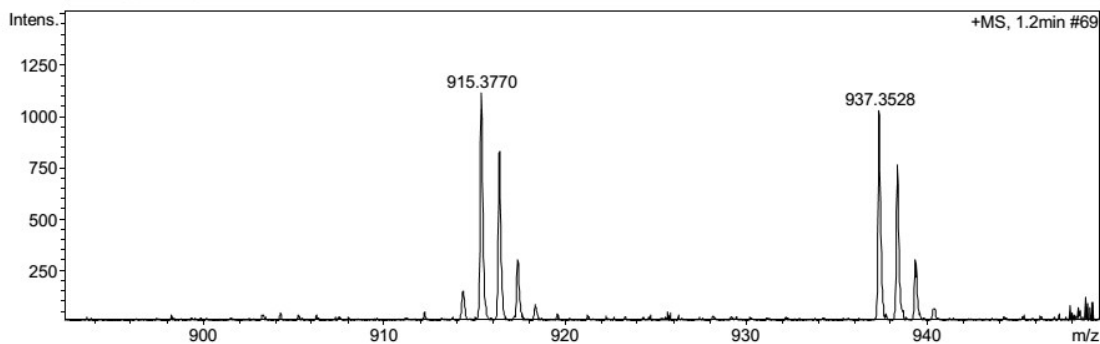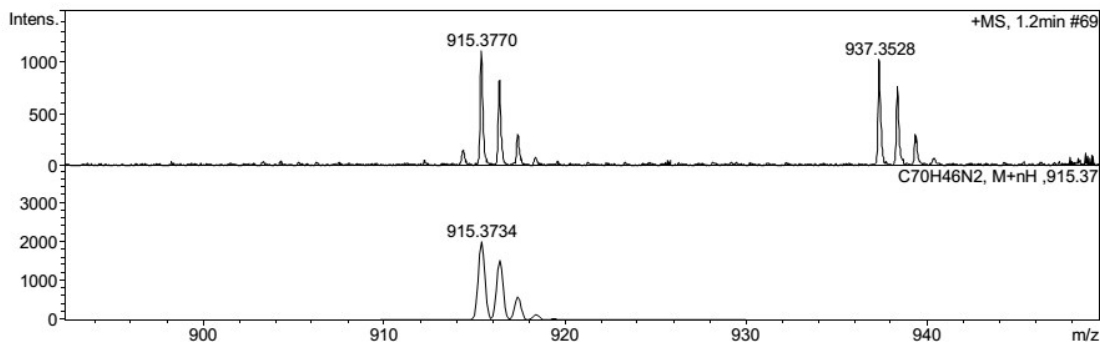

$^1\text{H}$  NMR of 2

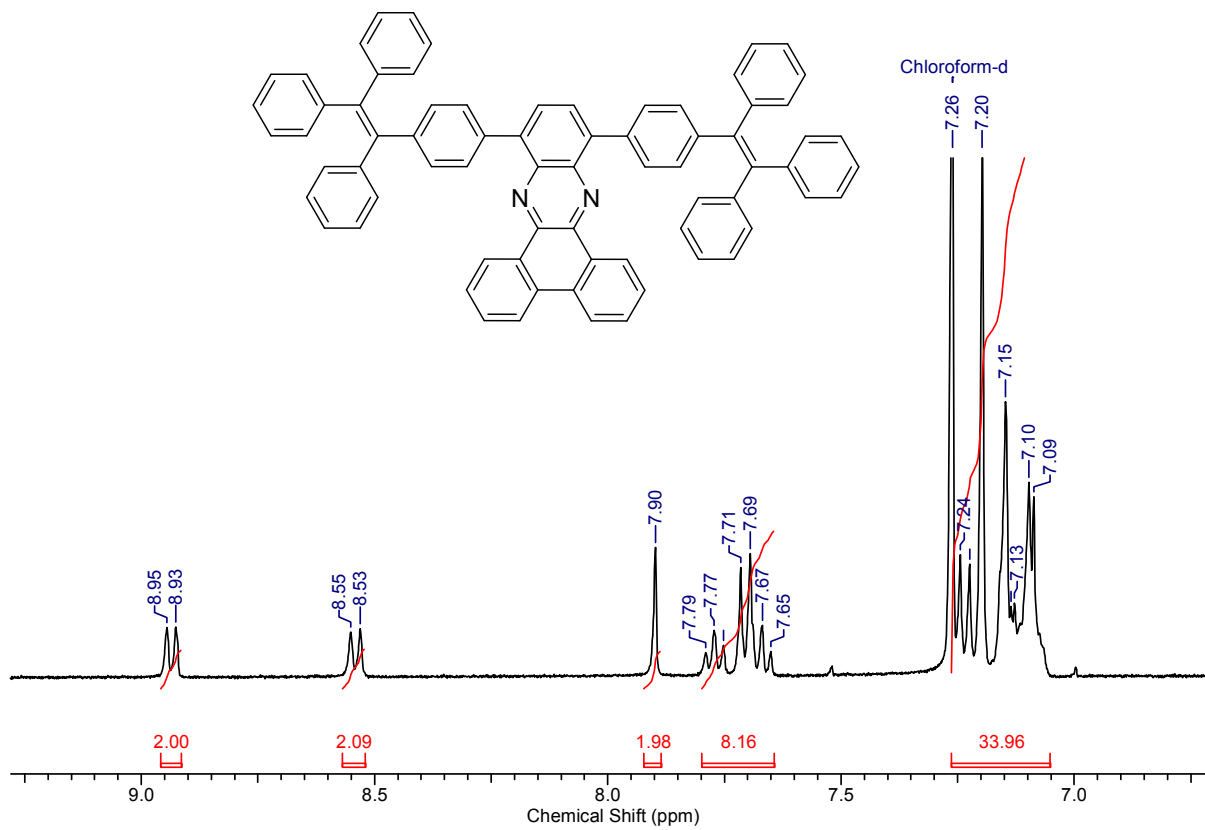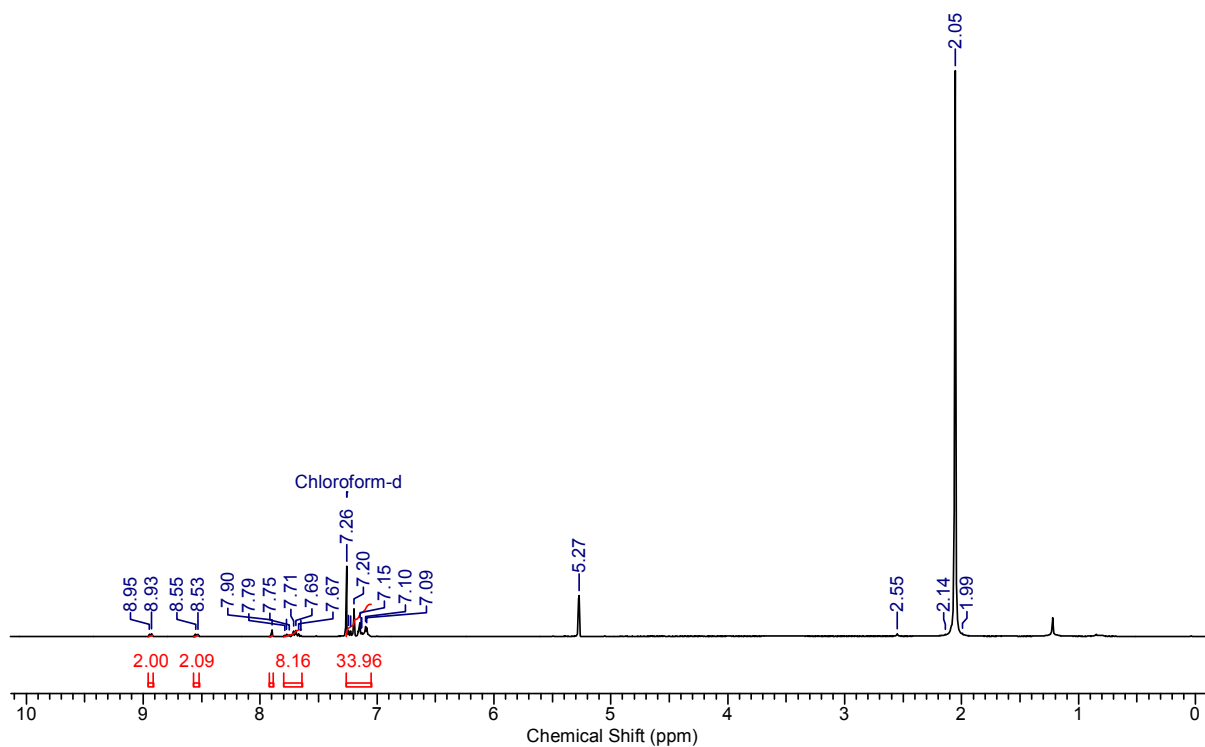



## Display Report

**Analysis Info**

|               |                                                                                   |                  |                        |
|---------------|-----------------------------------------------------------------------------------|------------------|------------------------|
| Analysis Name | C:\Users\iiti\Desktop\rm-ae-01-43b-hrms_RB3_01_505\rm-ae-01-40b-hrms_RB4_01_506.d | Acquisition Date | 10/18/2016 10:47:24 AM |
| Method        | lcms_direct infusion(ms+ lc)_3000.m                                               | Operator         | Ghanashyam Bhavsar     |
| Sample Name   | rm-ae-01-40b-hrms                                                                 | Instrument       | micrOTOF-Q II 10348    |
| Comment       |                                                                                   |                  |                        |

**Acquisition Parameter**

|             |            |                       |           |                  |           |
|-------------|------------|-----------------------|-----------|------------------|-----------|
| Source Type | ESI        | Ion Polarity          | Positive  | Set Nebulizer    | 2.0 Bar   |
| Focus       | Not active | Set Capillary         | 4500 V    | Set Dry Heater   | 250 °C    |
| Scan Begin  | 21 m/z     | Set End Plate Offset  | -500 V    | Set Dry Gas      | 7.0 l/min |
| Scan End    | 3000 m/z   | Set Collision Cell RF | 650.0 Vpp | Set Divert Valve | Waste     |

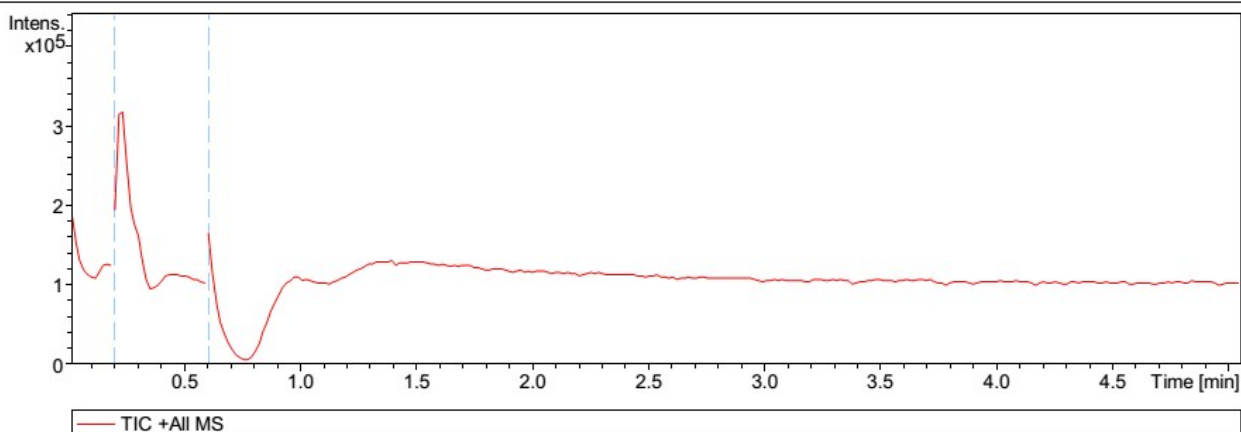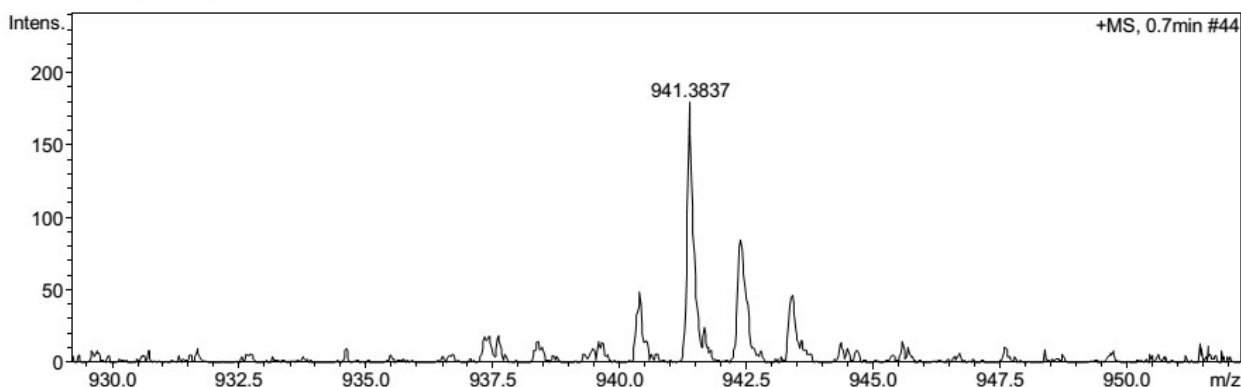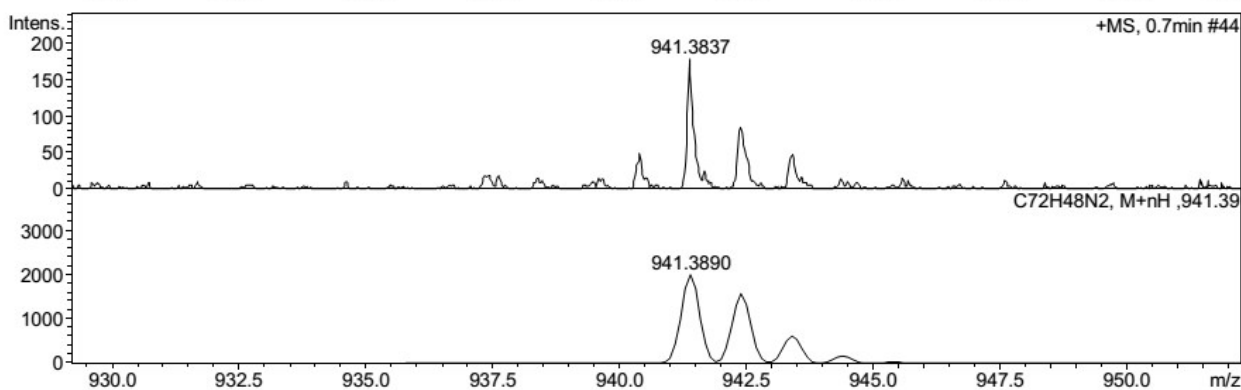

Supplement: c7nj01531c1.pdf [file c7nj01531c1.pdf]
